# Supplementary material
Source: publisher site journal article supplement (https://www.spandidos-publications.com/6010/downloadSupplementary)
Supplement: Supplementary file 1 [file downloadSupplementary]

Figure S1. Locations of the primers used for site-directed mutagenesis in the cDNA of human GATA4. The cDNA sequences of the human *GATA4* gene derived from the Nucleotide database with an accession number of NM\_002052.5 ([https://www.ncbi.nlm.nih.gov/nucore/NM\\_002052.5](https://www.ncbi.nlm.nih.gov/nucore/NM_002052.5)). The red color marks the coding region and the green color marks the wild-type forward primer. A rectangle marks the nucleotide where the mutation occurs.

[https://www.ncbi.nlm.nih.gov/nucore/NM\\_002052.5](https://www.ncbi.nlm.nih.gov/nucore/NM_002052.5)

```

1  ggggacttgg aggcggccgg cgcagggggcc gcgagaggct tcgtcgccgc tgcagctccg
61  ggggctccca ggggagcgtg cgcggaacct ccaggcccag caggaccccg gctgcgggca
121 ggaggaagga gccagcctag cagcttctgc gcctgtggcc gggggtgtcc tggaggcctc
181 tcggtgtgac gagtggggga cccgaaggct cgtgcgccac ctccaggcct ggacgctgcc
241 ctccgtcttc tgcccccaat aggtgcgccg gaccttcagg ccttggggtg aattcagctg
301 ctctacatc agcttcggga accacaaaaa attcaaattg ggattttccg gagtaaacia
361 gagcctagag ccctttgctc aatgctggat ttaatacgta tatattttta agcgagttgg
421 ttttttcccc ttgtattttt gatcttcgcg acagtctctc ccaacgcatat tatcgttgtt
481 gccgtcgttt tctctccccg cgtggctcct tgacctgcca gggagagaga ggacaccgaa
541 gccgggagct cgcagggacc atgtatcaga gcttggccat ggccgccaac cacgggcccgc
601 ccccggtgct ctacgaggcg ggccggcccc ggccttctat gcacggcgcg ggcccgcgct
661 cctcgccagt ctacgtgcc caccgcggg tgccctctc cgtgctgggc ctgtcttacc
721 tccagggcgg aggcgcgggc tctgcgtccg gaggcgcctc gggcggcagc tccggtgggg
781 ccgctgtctg tgccggggcc gggaccagc agggcagccc gggatggagc caggcgggag
841 ccgacggagc cgcttacacc ccgcgcggg tgcgcgcg cttctctctc ccggggacca
901 ccgggtccct ggccggcgcc gccgcgcgtg ccgcggcccc ggaagctgcg gcctacagca
961 gtggcgggcg agccggcggt gcgggcctgg cgggcccga gcagtacggg ccgcgcggct
1021 tcgcgggctc ctactccagc ccctaccggg cttacatggc cgacgtgggc gcgtcctggg
1081 ccgcagccgc ccgcgcctcc gccggcccct tcgacagccc ggtcctgcac agcctgcccg
1141 gccgggccaa cccggccgcc cgacacccca atctcgatat gtttgacgac ttctcagaag
1201 gcagagagtg tgtcaactgt ggggctatgt ccaccccgct ctggaggcga gatgggaagg
1261 gtcactatct gtgcaacgcc tgcggcctct accacaagat gaacggcatc aaccggccgc
1321 tcatcaagcc tcagcgccgg ctgtccgcct ccgcgcgagt gggcctctcc tgtgccaaact
1381 gccagaccac caccaccag ctgtggcgcc gcaatgcgga gggcgagcct gtgtgcaatg
1441 cctgcggcct ctacatgaag ctccacgggg tcccaggcc tcttgcaatg cggaaagagg
1501 ggatccaaac cagaaaacgg aagcccaaga acctgaataa atctaagaca ccagcagctc
1561 cttcaggcag tgagagcctt cctcccgcca gcggtgcttc cagcaactcc agcaacgcca
1621 ccaccagcag cagcgaggag atgcgtccca tcaagacgga gcctggcctg tcatctcact
1681 acgggcacag cagctccgtg tccagacgt tctcagtcag tgcgatgtct ggccatgggc
1741 cctccatcca cctgtcctc tcggccctga agctctcccc acaaggctat gcgtctcccc
1801 tcagccagtc tccacagacc agctccaagc aggactcttg gaacagcctg gtcttgggcg
1861 acagtcacgg ggacataatc actgcgtaat cttccctctt cctcctcaa attcctgcac
1921 ggacctggga cttggaggat agcaaagaag gaggcctggt gctcccaggg gccggcctcc

```
